# Supplementary material
Source: MDPI journal article supplement (https://www.mdpi.com/2073-4352/12/5/696)
Supplement: s1 [file s1 › crystals-1715791-supplementary.pdf]

## Supplementary materials

### Dynamic light scattering measurements

In this study, we decided to carry out DLS ( Dynamic light scattering), which is a technique that can be used to determine the size distribution profile of small particles in suspension or polymers in a solution, in order to gather information about changes in size distribution of graphene oxide (GO) nanoparticles. In short, the linearly polarized light beam of a 35 mW HeNe laser (Spectra Physics mod. 127) was focused by a 300 mm focal length lens on the sample cell, which consists of a quartz cylindrical cuvette (2 cm inner diameter).

The autocorrelation functions of the scattered light were constructed by a Brookhaven Instruments 2030AT digital correlator, processing the photocurrent pulse produced by a 9863A Thorn-EMI photomultiplier with built-in amplifier-discriminator. Light was collected at the scattering angle of 90° and a light collimator with a 50 mm pinhole allowed us to operate always with at least one coherence in the regime of pure homodyne detection. The autocorrelation function was Laplace inverted by the CONTIN routine.

As reported in Figure S1, Dynamic Light Scattering (DLS) measurements show that GO particles have an average size distribution range between 500 and 700 nm.

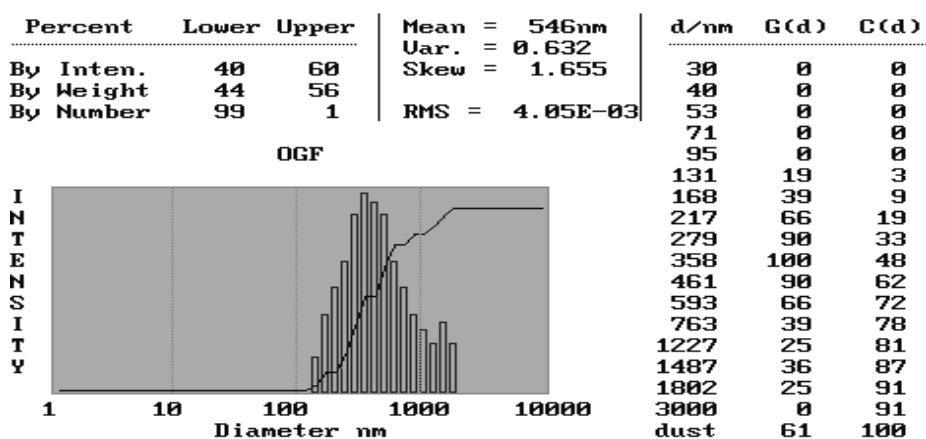

Figure S1: Particle size distribution was determined through DLS at an angle of 90°
